# Supplementary figures and images for: Decay of HIV DNA in the Reservoir and the Impact of Short Treatment Interruption in Kenyan Infants
Source: PubMed Central journal article supplement — Open Forum Infect Dis. 2017 Dec 9;5(1):ofx268. doi: 10.1093/ofid/ofx268 (PMC5767951; doi:10.1093/ofid/ofx268), 2017-12-09

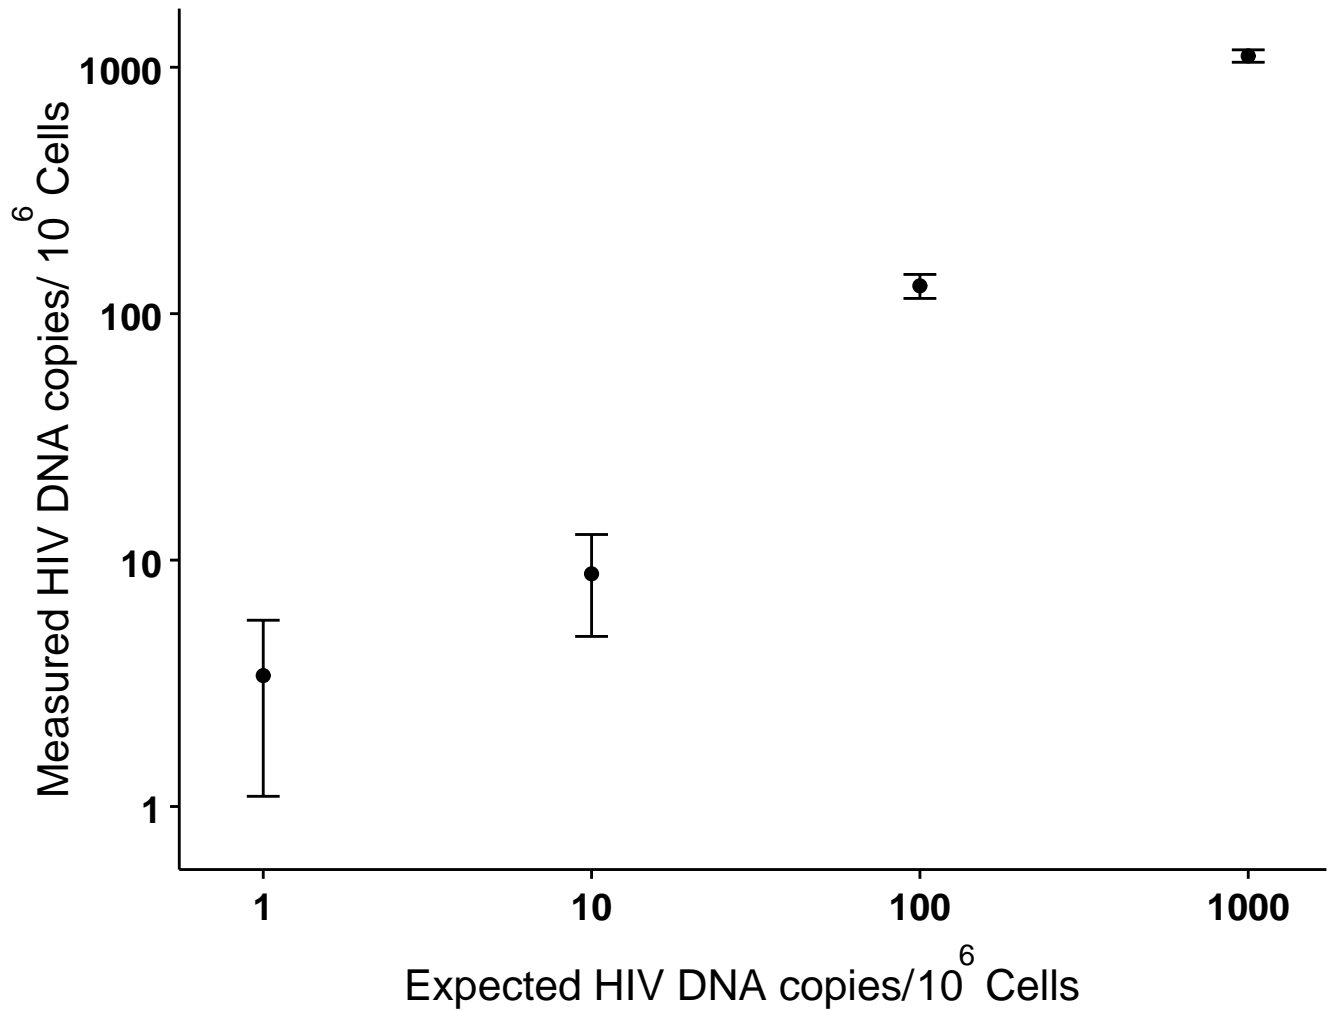

Supplement: ofx268_suppl_supplementary_figure_1.pdf [file ofx268_suppl_supplementary_figure_1.pdf]

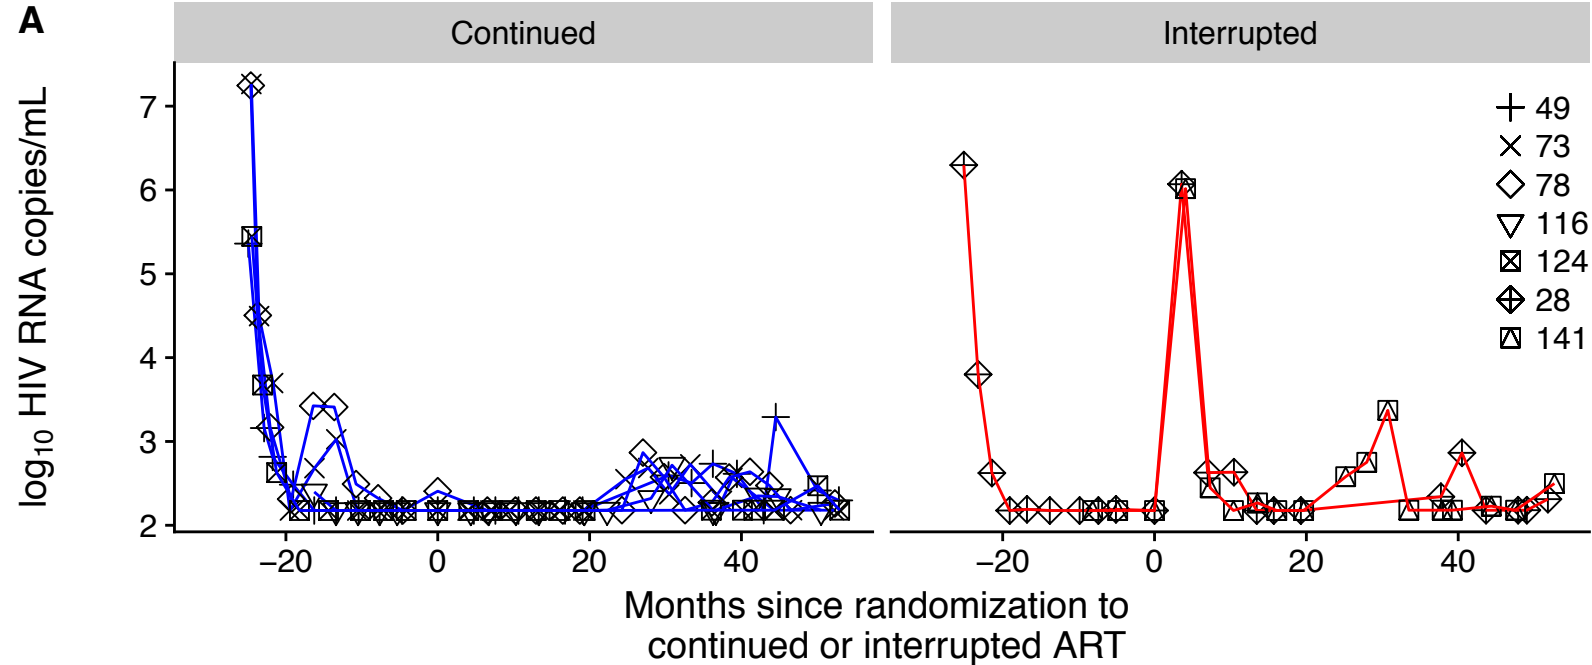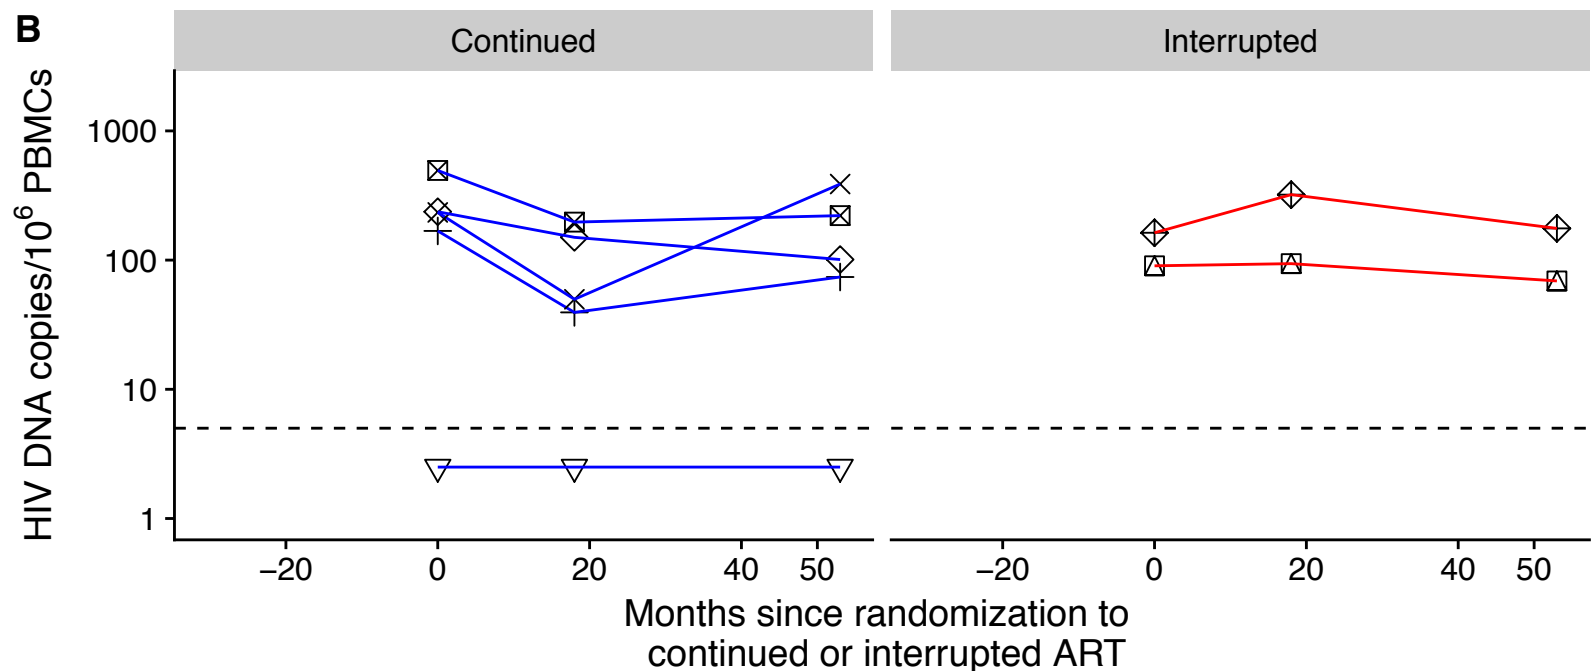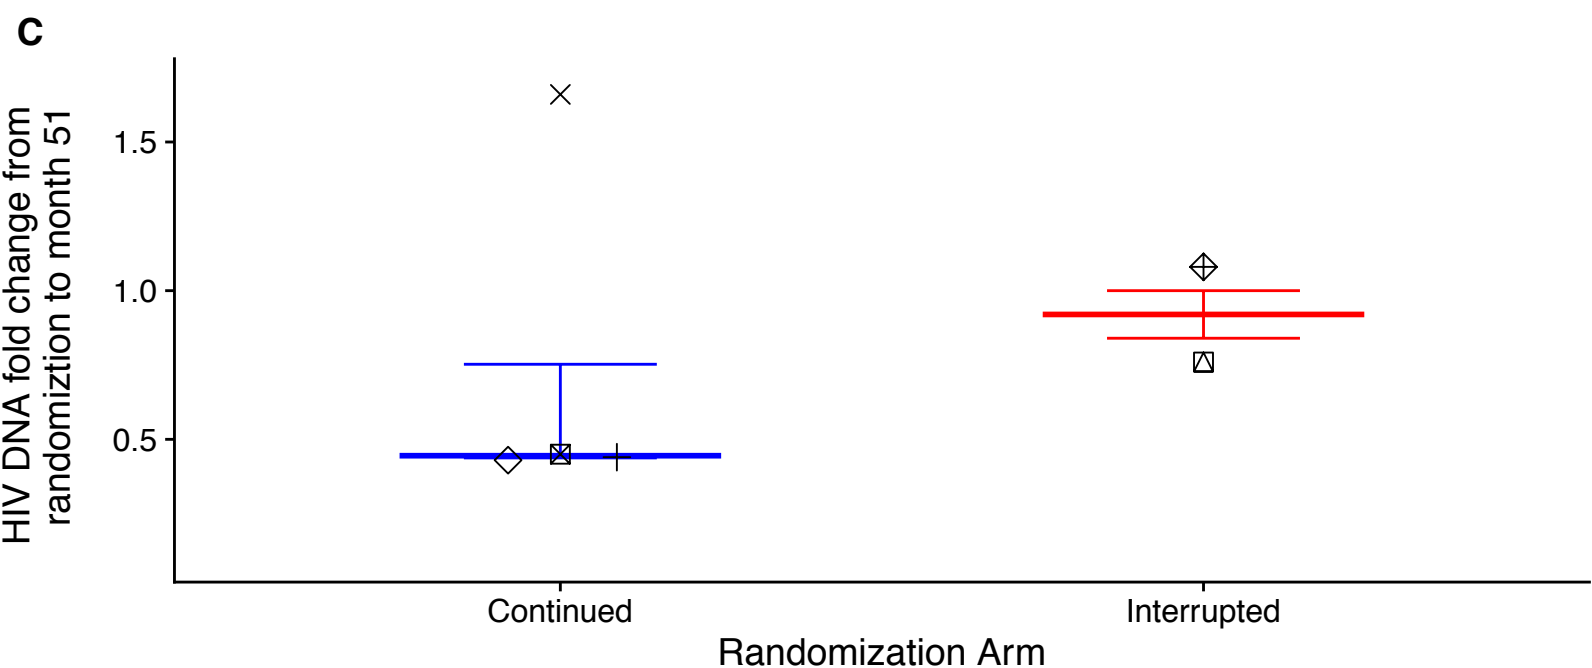

Supplement: ofx268_suppl_supplementary_figure_2.pdf [file ofx268_suppl_supplementary_figure_2.pdf]
